# Supplementary material for: Categorial Compositionality: A Category Theory Explanation for the Systematicity of Human Cognition
Source: PLoS Comput Biol. 2010 Jul 22;6(7):e1000858. doi: 10.1371/journal.pcbi.1000858 (PMC2908697; doi:10.1371/journal.pcbi.1000858)
Supplement: Text S1 — Proof that the free and forgetful functors for the category ASet form an adjoint functor pair. (0.10 MB PDF) [file pcbi.1000858.s001.pdf]

## Text S1

### Adjunction (proof)

We provide a proof of adjointness adapted from [1] to the more general case where actions also vary. Here, we write  $(X^*, \cdot, \epsilon)$  for the free monoid on the set  $X$  with binary associative operator  $\cdot$  and identity  $\epsilon$ .

**Definition (ASet).** The category **ASet** (sets with actions) has objects  $(Q, X, \delta)$  that consist of a set  $Q$ , and a set  $X$  whose members “act on” members of  $Q$ , and a map  $\delta : Q \times X \rightarrow Q$ , which specifies these actions. Thus, if  $q \in Q$  and  $x \in X$ , then  $\delta(q, x) \in Q$  is the result of  $x$  acting on  $q$ . The morphisms of **ASet** are the functions  $(g, \rho) : (Q, X, \delta) \rightarrow (R, Y, \gamma)$ , that is, pairs of maps  $g : Q \rightarrow R$  and  $\rho : X \rightarrow Y$ , such that the following diagram commutes:

$$\begin{array}{ccc} Q \times X & \xrightarrow{\delta} & Q \\ g \times \rho \downarrow & & \downarrow g \\ R \times Y & \xrightarrow{\gamma} & R \end{array} \quad (1)$$

where the identity morphism  $1_{Q, X, \delta}$  is the pair of identity maps  $(1_Q, 1_X)$ , and compositions are defined component-wise. That is, the composition of  $(g, \rho) : (Q, X, \delta) \rightarrow (R, Y, \gamma)$  and  $(h, \sigma) : (R, Y, \gamma) \rightarrow (S, Z, \xi)$  is  $(h, \sigma) \circ (g, \rho) : (Q, X, \delta) \rightarrow (S, Z, \xi)$ , and it is indeed an **ASet** morphism, that is, the following diagram commutes:

$$\begin{array}{ccc} Q \times X & \xrightarrow{\delta} & Q \\ g \times \rho \downarrow & & \downarrow g \\ R \times Y & \xrightarrow{\gamma} & R \\ h \times \sigma \downarrow & & \downarrow h \\ S \times Z & \xrightarrow{\xi} & S \end{array} \quad (2)$$

It is straightforward to prove that **ASet** is a category, by showing the morphisms satisfy the laws of identity and associativity.

**Definition (run map).** The *run map* of an object  $(Q, X, \delta)$  is the unique map  $\delta^* : Q \times X^* \rightarrow Q$ ,

defined inductively by:

$$\delta^*(q, \epsilon) = q, \quad \forall q \in Q \quad (3)$$

$$\delta^*(q, w \cdot [x]) = \delta(\delta^*(q, w), x), \quad \forall q \in Q, w \in X^*, x \in X. \quad (4)$$

If we regard  $X$  as a subset of  $X^*$ , i.e. as the part of  $X^*$  consisting of “lists” of length 1, then  $\delta^*(q, [x]) = \delta^*(q, \epsilon \cdot [x]) = \delta(\delta^*(q, \epsilon), x) = \delta(q, x)$ , so  $\delta^*$  does indeed agree with  $\delta$  on  $Q \times X \subset Q \times X^*$ .

It is immediate that if  $(Q, X, \delta)$  is an ASet, then so is  $(Q \times X^*, X, \mu_{Q,X})$ , where  $\mu_{Q,X} : (Q \times X^*) \times X \rightarrow Q \times X^*$ , such that  $\mu_{Q,X} : ((q, w), x) \mapsto (q, w \cdot [x])$ .

**Proposition.** If  $(Q, X, \delta)$  is an ASet, then the following diagram commutes:

$$\begin{array}{ccc} (Q \times X^*) \times X & \xrightarrow{\mu_{Q,X}} & Q \times X^* \\ \delta^* \times 1_X \downarrow & & \downarrow \delta^* \\ Q \times X & \xrightarrow{\delta} & Q \end{array} \quad (5)$$

That is,  $(\delta^*, 1_x)$  is a morphism of ASets.

**Proof.** For all  $q \in Q, w \in X^*, x \in X$ ,

$$\begin{aligned} \delta^* \circ \mu_{Q,X}((q, w), x) &= \delta^*(q, w \cdot [x]) && \text{(definition of } \mu_{Q,X}) \\ &= \delta(\delta^*(q, w), x) && \text{(Equation 4)} \\ &= \delta \circ (\delta^* \times 1_X)((q, w), x) && \square \end{aligned}$$

Recall the forgetful functor  $U : \mathbf{ASet} \rightarrow \mathbf{Set} \times \mathbf{Set}$ , such that  $U : (T, Z, \zeta) \mapsto (T, Z)$ .

**Theorem.** Define a functor  $F : \mathbf{Set} \times \mathbf{Set} \rightarrow \mathbf{ASet}$  as follows:  $F_0 : (Q, X) \mapsto (Q \times X^*, X, \mu_{Q,X})$ . A  $\mathbf{Set} \times \mathbf{Set}$  morphism is a pair of maps  $(j, \tau) : (Q, X) \rightarrow (R, Y)$ , i.e.,  $j : Q \rightarrow R$  and  $\tau : X \rightarrow Y$ . The result of applying  $F_1 : (Q \times X^*, X, \mu_{Q \times X^*, X}) \rightarrow (R \times Y^*, Y, \mu_{R \times Y^*, Y})$  to the morphism  $(j, \tau)$  is  $(j \times \tau^*, \tau)$ . Define  $\eta : 1_{\mathbf{ASet}} \rightarrow U \circ F$  on each object  $(Q, X)$  to be  $\eta_{Q,X} : (q, x) \mapsto ((q, \epsilon), x)$ . Then  $F$  is the left adjoint of  $U$ , and  $\eta$  is the unit of the adjunction.  $F(Q, X)$  is called the free ASet on  $(Q, X)$ .

**Proof.** It is routine to check that  $F_1(j, \tau)$  is an ASet morphism. To prove that  $F$  is the left adjoint, we have to show for any ASet  $(R, Y, \gamma)$ , so  $\gamma : R \times Y \rightarrow R$ , and any pair of maps  $(g, \rho) : (Q, X) \rightarrow (R, Y)$ , where  $g : Q \rightarrow R$  and  $\rho : X \rightarrow Y$ , that there exists a unique morphism of ASets  $\psi : (Q \times X^*, X, \mu_{Q,X}) \rightarrow$

$(R, Y, \gamma)$ , such that  $(g, \rho) = U(\psi) \circ \eta_{Q, X}$ . Such a morphism  $\psi$  must consist of a pair of maps,  $\psi = (h, \chi)$ , where  $h : Q \times X^* \rightarrow R$ , and  $\chi : X \rightarrow Y$ . So, we are looking for a unique morphism  $\psi = (h, \chi)$ , such that  $(g, \rho) = (h, \chi) \circ \eta_{Q, X}$ , that is, the following diagram commutes:

$$\begin{array}{ccc}
 (Q, X) & \xrightarrow{\eta_{Q, X}} & (Q \times X^*, X) \\
 & \searrow (g, \rho) & \downarrow (h, \chi) \\
 & & (R, Y)
 \end{array}
 \quad
 \begin{array}{ccc}
 (Q \times X^*, X, \mu_{Q, X}) & & \\
 \downarrow \psi & & \\
 (R, Y, \gamma) & &
 \end{array}
 \quad (6)$$

and since  $\psi = (h, \chi)$  is a morphism, such that the following diagram also commutes:

$$\begin{array}{ccc}
 (Q \times X^*) \times X & \xrightarrow{\mu_{Q \times X^*, X}} & Q \times X^* \\
 h \times \chi \downarrow & & \downarrow h \\
 R \times Y & \xrightarrow{\gamma} & R
 \end{array}
 \quad (7)$$

We have to show that the commutativity of Diagrams 6 and 7 determines  $\psi$  uniquely. Diagram 6 says that for all  $q \in Q$ ,  $x \in X$

$$\begin{aligned}
 (h, \chi) \circ \eta_{Q, X}(q, x) &= (g, \rho)(q, x) \\
 \text{i.e., } (h, \chi)((q, \epsilon), x) &= (g(q), \rho(x)) \\
 \text{i.e., } (h(q, \epsilon), \chi(x)) &= (g(q), \rho(x)).
 \end{aligned}$$

Thus, Diagram 6 forces, for all  $x \in X$ ,  $\chi(x) = \rho(x)$ , i.e.,  $\chi = \rho$ , and for all  $q \in Q$ ,

$$h(q, \epsilon) = g(q). \quad (8)$$

Equation 8 forms the base part for the recursive definition of  $h$ .

Following the clockwise path in Diagram 7 applied to  $q \in Q$ ,  $w \in X^*$ ,  $x \in X$  gives us  $h \circ \mu_{Q \times X^*, X}((q, w), x) = h(q, w \cdot [x])$ , by definition of  $\mu$ . Following the anticlockwise path in Diagram 7 gives us, since  $\chi = \rho$ ,  $\gamma \circ (h \times \chi)((q, w), x) = \gamma \circ (h, \rho)((q, w), x) = \gamma(h(q, w), \rho(x))$ . Commutativity of Diagram 7 requires these two paths to be equal, i.e.,

$$h(q, w \cdot [x]) = \gamma(h(q, w), \rho(x)). \quad (9)$$

This equation provides the recursive part of the definition of  $h$ . So, if  $h$  exists, then it satisfies Equations 3 and 9.

The length of a string  $w$  was defined in Diagram 11. It is now straightforward to prove by induction on the length of  $w$  that  $h(q, w) = \gamma^*(g(q), \rho^*(w))$ , for all  $q \in Q$ ,  $w \in X^*$ , where  $\gamma^* : R \times Y^* \rightarrow R$  is the run map of  $(R, Y, \gamma)$ .

Base: If  $\text{length}(w') = 0$ ,  $w' = \epsilon$ , so  $h(q, w') = h(q, \epsilon) = g(q)$ . But,  $\gamma^*(g(q), \rho^*(w')) = \gamma^*(g(q), \rho^*(\epsilon)) = \gamma^*(g(q), \epsilon) = g(q)$ , by definition of the run map  $\gamma^*$ , so in this case  $h(g(q), \epsilon) = g(q)$ . So, the base case is proven.

Inductive step: If  $\text{length}(w') > 0$ , then  $w' = w \cdot [x]$  for  $w \in X^*$ ,  $x \in X$ , so

$$\begin{aligned}
 h(q, w') &= h(q, w \cdot [x]) \\
 &= \gamma(h(q, w), \rho(x)) && \text{(Equation 9)} \\
 &= \gamma(\gamma^*(g(q), \rho^*(w)), \rho(x)) && \text{(induction hypothesis)} \\
 &= \gamma((g(q), \rho^*(w)) \cdot \rho(x)) && \text{(definition of } \gamma^*) \\
 &= \gamma((g(q), \rho^*(w \cdot [x])) && \text{(definition of } \rho^*) \\
 &= \gamma((g(q), \rho^*(w')). && \text{(as required)}
 \end{aligned}$$

As the base and inductive cases are proven, the principle of induction establishes the result.  $\square$

## References

1. Arbib MA, Manes EG (1975) Arrows, structures, and functors: The categorical imperative. London, UK: Academic Press.
